# Supplementary material for: Comparative analysis of oral treponemes associated with periodontal health and disease
Source: PubMed Central journal article supplement (PMC3637317; doi:10.1186/1471-2334-13-174), 2013-04-11

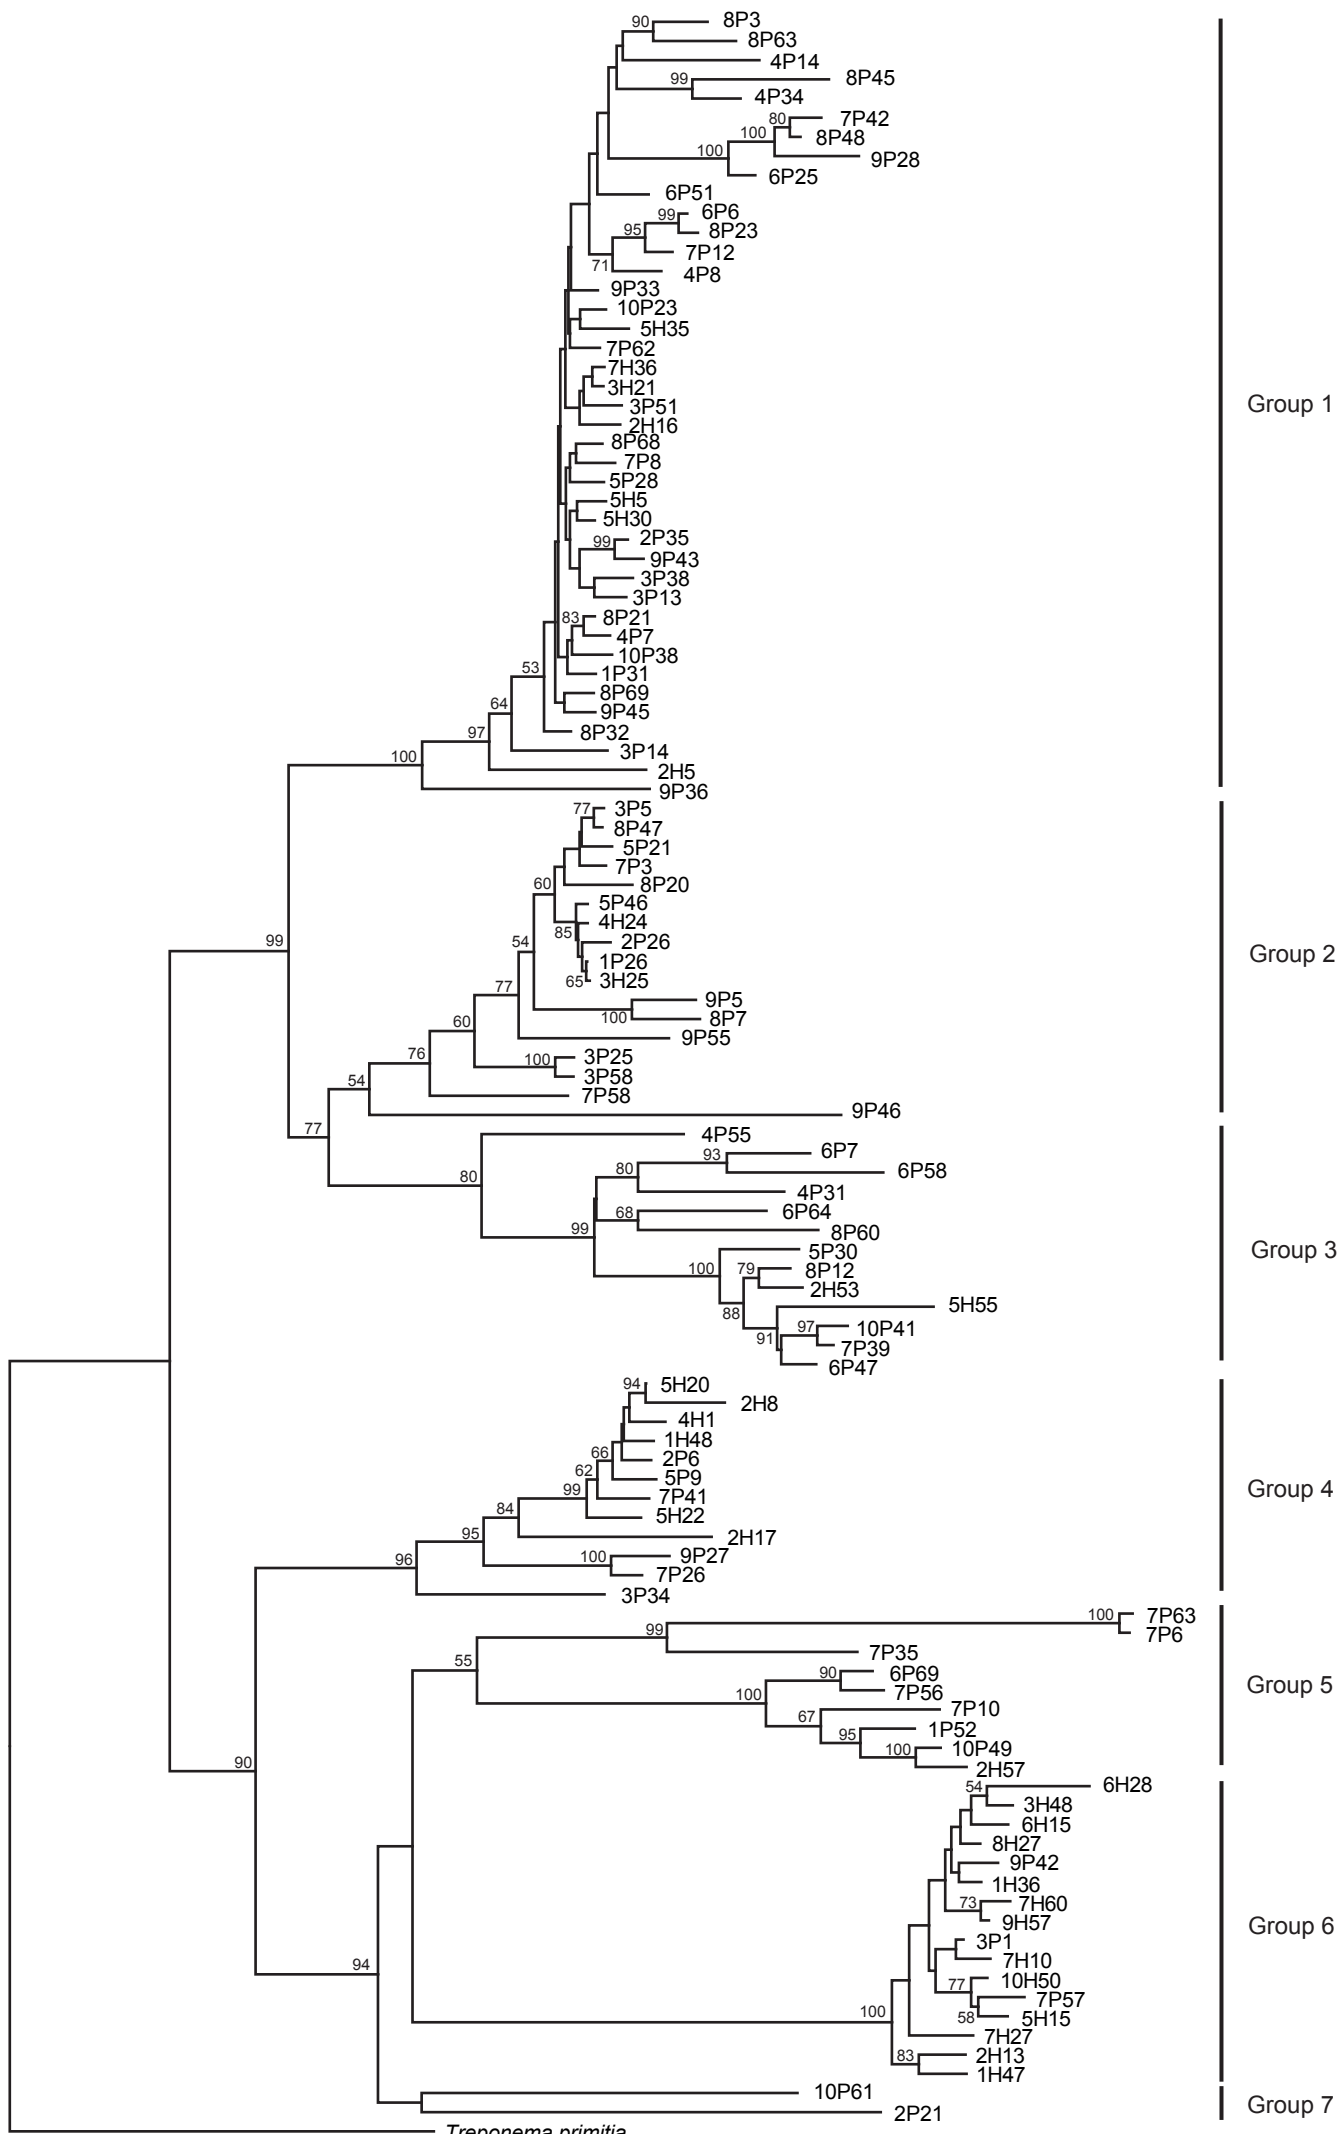

Supplement: 1471-2334-13-174-S4.pdf [file 1471-2334-13-174-S4.pdf]
